# Supplementary material for: A Workflow to Identify and Monitor Slow-Moving Landslides through Spaceborne Optical Feature Tracking
Source: Copernicus journal article supplement (doi:10.5194/egusphere-2025-2795), 2025-06-27
Supplement: Supplementary file [file egusphere-2025-2795-RC3-supplement.pdf]

### **General and Specific comments:**

1. Lines 211-212 – You mention that the output time series is compatible with the ‘InSAR Explorer’ plugin. However, this is not the case. The files need conversion for this. Please clarify this.
2. The figures are not mentioned in the text at all, except Figure 4. Also, in section 4.1, which is about the Slumgullion case, you refer to a figure about the Chaos Canyon landslide (lines 246-248). This is a bit confusing. Can you fix this or switch the sections if it is more appropriate?
3. It would be better to use the Copernicus DEM rather than the SRTM. COPDEM has a more recent version of Earth's surface, and although it is a DSM that includes buildings, infrastructure, and vegetation, it is often better for calculating morphometric variables, especially if the tool performs poorly in forested areas.
4. Did you try comparing the displacement results with the in-situ instruments' recordings? I understand that this approach complements InSAR measurements, but it would be nice to know how much the calculated displacements differ from ground truth. For example, Slumgullion has been very well investigated with in-situ instruments, and such a comparison could be conducted.
5. What is the performance of the tool in areas covered by snow for large periods of the year (higher than 4-6 months)? Can you show such an example?
6. Are forests or highly vegetated areas limiting the use of Terratrack? Probably should be mentioned in the discussions section.
7. Google Colab limits the analysis of large areas, depending on the plan. I think this point should also be addressed in the discussion section.

### **Typo comments:**

Line 48 – Probably is missing a citation, only parentheses without anything.

There is an inconsistency for AOI/Aoi/AoI. Please, check that.
